# Supplementary material for: Isolable cyclic radical cations of heavy main-group elements
Source: Royal Society of Chemistry journal article supplement (doi:10.1039/c9cc09582a), 2020-01-01
Supplement: c9cc09582a1.pdf [file c9cc09582a1.pdf]

## Isolable cyclic radical cations of heavy main-group elements

Haiyan Cui,<sup>a,b</sup> Dengmengfei Xiao,<sup>c</sup> Li Zhang,<sup>b</sup> Huapeng Ruan,<sup>b</sup> Yong Fang,<sup>b</sup> Yue Zhao,<sup>b</sup> Gengwen Tan,<sup>b,\*</sup> Lili Zhao,<sup>c,\*</sup> Gernot Frenking,<sup>c,d,\*</sup> Matthias Driess,<sup>e</sup> Xinping Wang<sup>b,\*</sup>

<sup>a</sup> Jiangsu Key Laboratory of Pesticide Science, College of Sciences, Nanjing Agricultural University, Nanjing 210095, China

<sup>b</sup> State Key Laboratory of Coordination Chemistry, School of Chemistry and Chemical Engineering, Nanjing University, Nanjing 210023, China

<sup>c</sup> Institute of Advanced Synthesis, School of Chemistry and Molecular Engineering, Jiangsu National Synergetic Innovation Center for Advanced Materials, Nanjing Tech University, Nanjing 211816, China

<sup>d</sup> Fachbereich Chemie, Philipps-Universität Marburg Hans-Meerwein-Strasse 4, 35032 Marburg, Germany

<sup>e</sup> Department of Chemistry: Metalorganics and Inorganic Materials, Technische Universität Berlin, Strasse des 17. Juni 135, 10623 Berlin, Germany

## Content

|                                                                                                                       |     |
|-----------------------------------------------------------------------------------------------------------------------|-----|
| Experimental section.....                                                                                             | S3  |
| Table S1. Crystal data and structure refinement.....                                                                  | S5  |
| Fig. S1 Molecular structure of <b>2</b> .....                                                                         | S6  |
| Fig. S2 Cyclic voltammograms of <b>1</b> and <b>2</b> .....                                                           | S6  |
| Fig. S3 Comparison of selected molecular orbitals of neutral and radical cation of <b>1</b> and <b>2</b> .....        | S7  |
| Fig. S4 Selected molecular orbitals of <b>1</b> <sup>•+</sup> and <b>2</b> <sup>•+</sup> . .....                      | S7  |
| Fig. S5 Experimental and calculated UV/Vis spectra of <b>1</b> <sup>•+</sup> and <b>2</b> <sup>•+</sup> .....         | S8  |
| Calculation details for the electron occupation of 3s and 3p orbitals in <b>1</b> <sup>•+</sup> . .....               | S9  |
| DFT calculations .....                                                                                                | S10 |
| Table S2. Calculated EPR parameters. ....                                                                             | S10 |
| Table S3. Calculated bond parameters.....                                                                             | S11 |
| Table S4. Calculated excited wavelengths ( $\lambda$ ) and oscillator strengths ( $f$ ) of selected transitions ..... | S11 |
| Table S5. Main frontier molecular orbitals related to UV/vis absorption transitions.....                              | S12 |
| References.....                                                                                                       | S33 |

## Experimental section

General considerations: All operations were carried out under an atmosphere of dry argon or nitrogen by using modified Schlenck line and a glovebox. All solvents were freshly distilled from Na/benzophenone or CaH<sub>2</sub> and degassed prior to use. UV-Vis spectra were recorded on the Lambda 750 spectrometer. Element analyses were performed at Shanghai Institute of Organic Chemistry, the Chinese Academy of Sciences and Center of Modern Analysis, Nanjing University. The <sup>1</sup>H NMR and <sup>13</sup>C NMR spectroscopic data were recorded on a Bruker DRX 400 and 500 MHz NMR spectrometers. EPR spectra were obtained using Bruker plus-6/1 X-band variable-temperature apparatus. The X-ray single crystal diffraction data were collected on Bruker D8 CMOS detectors at 173 K. Compounds L<sup>H</sup>GeCl (L<sup>H</sup> = CH[CHNDipp]<sub>2</sub>, Dipp=2,6-*i*Pr<sub>2</sub>C<sub>6</sub>H<sub>3</sub>),<sup>S1</sup> [L<sup>H</sup>GeP]<sub>2</sub>,<sup>S1</sup> NaAsCO•(18-c-6)<sup>S2</sup> and Ag[Al(OR<sub>F</sub>)<sub>4</sub>] (R<sub>F</sub> = C(CF<sub>3</sub>)<sub>3</sub>)<sup>S3</sup> were prepared by the published procedures.

**Synthesis of 2:** Cold toluene (60 ml) was added to the mixture of L<sup>H</sup>GeCl (1.32 g, 2.65 mmol) and NaAsCO•(18-c-6) (1.33 g, 3.41 mmol) at -78 °C. The mixture was allowed to warm to room temperature in 2 h and a dark mixture was formed. After filtration, the black filtrate was stored in dark place at room temperature for 2 d and dark brown crystals were formed (0.31 g, 21.8 %); m.p.: 259.6-261.3 °C; <sup>1</sup>H NMR (500 MHz, d<sup>8</sup>-THF): δ = 7.23 – 7.16 (m, 8H, Ar-*H* and beta-*H*), 7.07 (d, *J*=7.7, 8H, Ar-*H*), 4.99 (t, *J*=6.6, 2H, gamma-*H*), 3.44 (m, 8H, CH(CH<sub>3</sub>)<sub>2</sub>), 1.03 (dd, *J*=6.6, 3.5, 48H, CH(CH<sub>3</sub>)<sub>2</sub>); <sup>13</sup>C NMR (101 MHz, d<sup>8</sup>-THF): δ = 163.59, 155.60 (beta-C), 145.78, 144.51, 128.00, 124.66 (Ar-C), 92.47 (gamma-CH), 29.72 (CH(CH<sub>3</sub>)<sub>2</sub>), 26.23, 23.78 (CH(CH<sub>3</sub>)<sub>2</sub>). Elemental analysis calcd (%) for C<sub>54</sub>H<sub>74</sub>As<sub>2</sub>Ge<sub>2</sub>N<sub>4</sub>: C, 60.37; H, 6.94; N, 5.22; Found: C, 60.59; H, 6.84; N, 5.55.

**Synthesis of 1<sup>+</sup>•[Al(OR<sub>F</sub>)<sub>4</sub>]<sup>-</sup>:** Fluorobenzene (30 ml) was added to the mixture of **1** (105 mg, 0.11 mmol) and Ag[Al(OR<sub>F</sub>)<sub>4</sub>] (116 mg, 0.11 mmol) under dark. In 30 min, the light green suspension changed into orange red solution and gray precipitate (Ag

metal) was formed. The mixture was stirred overnight. After filtration, the filtrate was concentrated to ca. 3 mL and stored at 4 °C for 1 d to afford orange crystals of  $1^{+} \cdot [Al(OR_F)_4]^{-}$  (68 mg, 32.7%); m.p.: 240.5-241.3 °C; elemental analysis calcd (%) for  $C_{70}H_{74}AlF_{36}Ge_2N_4O_4P_2$ : C, 43.04; H, 3.82; N, 2.87; Found: C, 43.02; H, 3.93; N, 2.79.

**Synthesis of  $2^{+} \cdot [Al(OR_F)_4]^{-}$ :** Fluorobenzene (30 ml) was added to the mixture of **2** (174 mg, 0.16 mmol) and  $Ag[Al(OR_F)_4]$  (176 mg, 0.16 mmol). The mixture was stirred overnight. Brown precipitate (Ag metal) was formed. After filtration, the orange filtrate was concentrated to ca. 3 mL and stored at 4 °C for 1 d to afford orange crystals of  $2^{+} \cdot [Al(OR_F)_4]^{-}$  (230 mg, 75.4%); m.p. 192.1-194.5 °C; Elemental analysis calcd (%) for  $C_{70}H_{74}AlAs_2F_{36}Ge_2N_4O_4 \cdot C_6H_5F$ : C, 42.70; H, 3.73; N, 2.62; found: C, 42.79; H, 3.76; N, 2.62.

**Table S1. Crystal data and structure refinement**

|                                                                 | <b>2</b>                                                                       | <b>1<sup>++</sup>•[Al(OR<sub>F</sub>)<sub>4</sub>]<sup>-</sup></b>                                             | <b>2<sup>++</sup>•[Al(OR<sub>F</sub>)<sub>4</sub>]<sup>-</sup></b>                                              |
|-----------------------------------------------------------------|--------------------------------------------------------------------------------|----------------------------------------------------------------------------------------------------------------|-----------------------------------------------------------------------------------------------------------------|
| CCDC No.                                                        | 1889601                                                                        | 1889602                                                                                                        | 1889603                                                                                                         |
| Formula                                                         | C <sub>54</sub> H <sub>74</sub> As <sub>2</sub> Ge <sub>2</sub> N <sub>4</sub> | C <sub>70</sub> H <sub>74</sub> AlF <sub>36</sub> Ge <sub>2</sub> N <sub>4</sub> O <sub>4</sub> P <sub>2</sub> | C <sub>70</sub> H <sub>74</sub> AlAs <sub>2</sub> F <sub>36</sub> Ge <sub>2</sub> N <sub>4</sub> O <sub>4</sub> |
| Formula weight                                                  | 1074.32                                                                        | 1953.51                                                                                                        | 2041.41                                                                                                         |
| Temp. (K)                                                       | 123(2)                                                                         | 123(2)                                                                                                         | 123(2)                                                                                                          |
| Crystal system                                                  | Monoclinic                                                                     | Monoclinic                                                                                                     | Orthorhombic                                                                                                    |
| Space group                                                     | <i>P</i> 2 <sub>1</sub> / <i>c</i>                                             | <i>C</i> 2/ <i>c</i>                                                                                           | <i>Cmc</i> 2 <sub>1</sub>                                                                                       |
| <i>a</i> (Å)                                                    | 21.3357(6)                                                                     | 29.5048(15)                                                                                                    | 19.7185(18)                                                                                                     |
| <i>b</i> (Å)                                                    | 15.3136(4)                                                                     | 16.5238(7)                                                                                                     | 19.794(2)                                                                                                       |
| <i>c</i> (Å)                                                    | 16.1347(5)                                                                     | 19.4551(9)                                                                                                     | 22.651(2)                                                                                                       |
| $\beta$ (°)                                                     | 93.7100(10)                                                                    | 118.250(2)                                                                                                     | 90                                                                                                              |
| <i>V</i> [Å <sup>3</sup> ]                                      | 5260.6(3)                                                                      | 8355.2(7)                                                                                                      | 8841.0(15)                                                                                                      |
| <i>Z</i>                                                        | 4                                                                              | 4                                                                                                              | 4                                                                                                               |
| $\rho_{\text{calcd}}$ (g·cm <sup>-3</sup> )                     | 1.356                                                                          | 1.553                                                                                                          | 1.606                                                                                                           |
| $\mu$ (mm <sup>-1</sup> )                                       | 2.039                                                                          | 0.896                                                                                                          | 1.559                                                                                                           |
| <i>F</i> (000)                                                  | 2224                                                                           | 3940                                                                                                           | 4284                                                                                                            |
| Collected data                                                  | 92072                                                                          | 30017                                                                                                          | 36382                                                                                                           |
| Unique data                                                     | 9471 [ <i>R</i> (int) =<br>0.0755]                                             | 7363 [ <i>R</i> (int) =<br>0.0678]                                                                             | 9935 [ <i>R</i> (int) = 0.0553]                                                                                 |
| GOF on <i>F</i> <sup>2</sup>                                    | 1.053                                                                          | 1.203                                                                                                          | 1.050                                                                                                           |
| Final <i>R</i> indexes<br>[ <i>I</i> > 2 $\sigma$ ( <i>I</i> )] | <i>R</i> <sub>1</sub> = 0.0425<br>$\omega R$ <sub>2</sub> = 0.1103             | <i>R</i> <sub>1</sub> = 0.0956<br>$\omega R$ <sub>2</sub> = 0.1998                                             | <i>R</i> <sub>1</sub> = 0.0536<br>$\omega R$ <sub>2</sub> = 0.1455                                              |
| <i>R</i> indexes (all data)                                     | <i>R</i> <sub>1</sub> = 0.0512<br>$\omega R$ <sub>2</sub> = 0.1176             | <i>R</i> <sub>1</sub> = 0.1309<br>$\omega R$ <sub>2</sub> = 0.2098                                             | <i>R</i> <sub>1</sub> = 0.0596<br>$\omega R$ <sub>2</sub> = 0.1518                                              |
| Completeness                                                    | 0.999                                                                          | 0.999                                                                                                          | 0.996                                                                                                           |

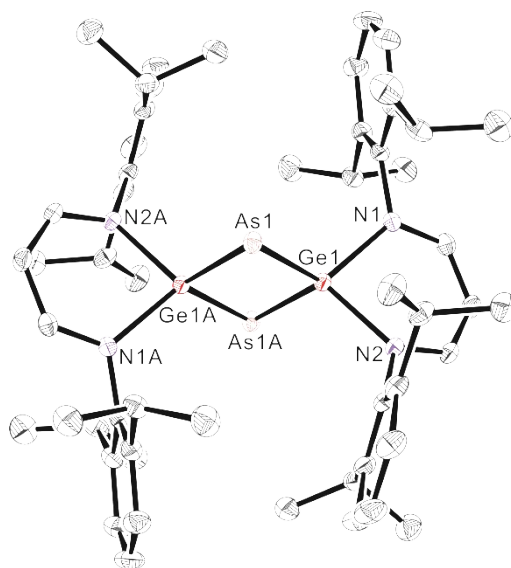

**Fig. S1** Molecular structure of **2** drawn at 50% probability. Hydrogen atoms are omitted for clarity. Selected bond lengths (Å) and angles (°): Ge1–N1 1.988(2), Ge1–N2 1.988(2), Ge1–As1 2.3668(4), Ge1–As1A 2.3733(4); N1–Ge1–N2 88.76(9), As1–Ge1–As1A 106.603(14), Ge1–As1–Ge1A 73.398(14).

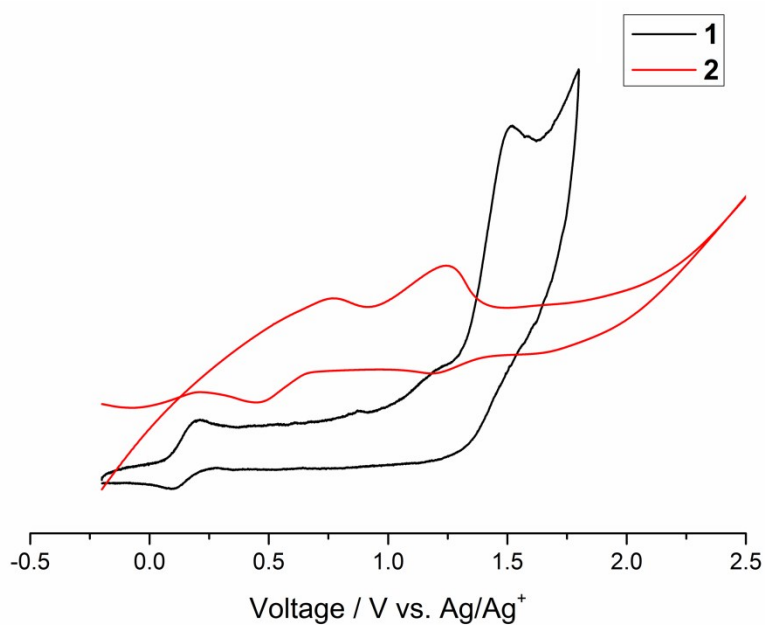

**Fig. S2** Cyclic voltammograms of **1** and **2** measured in fluorobenzene solutions at room temperature, containing 0.05 M  $n\text{Bu}_4\text{PF}_6$ , measured at 100 mV/s.

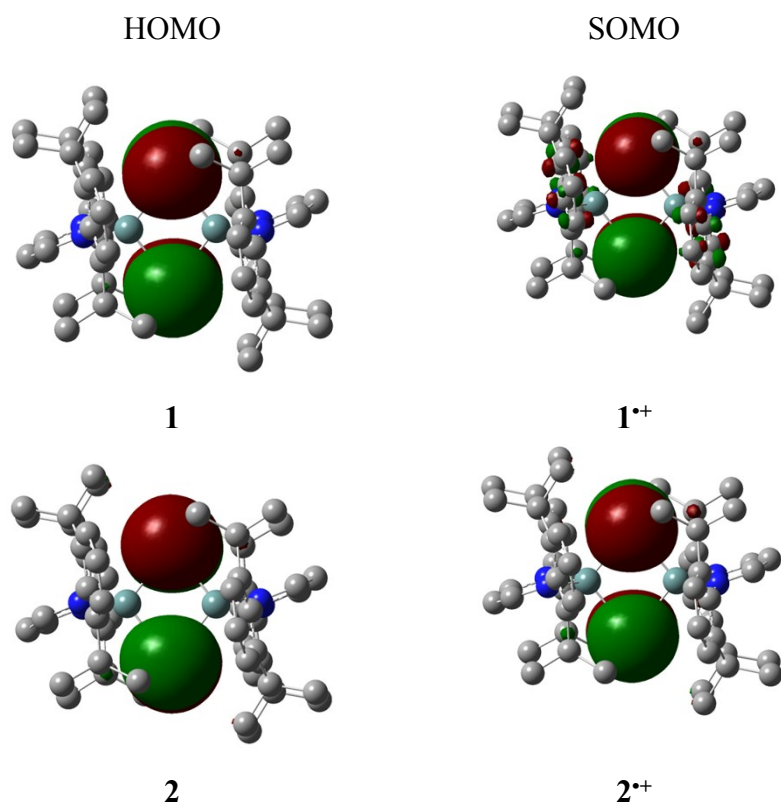

**Fig. S3** Comparison of selected molecular orbitals of neutral and radical cation of **1** and **2**.

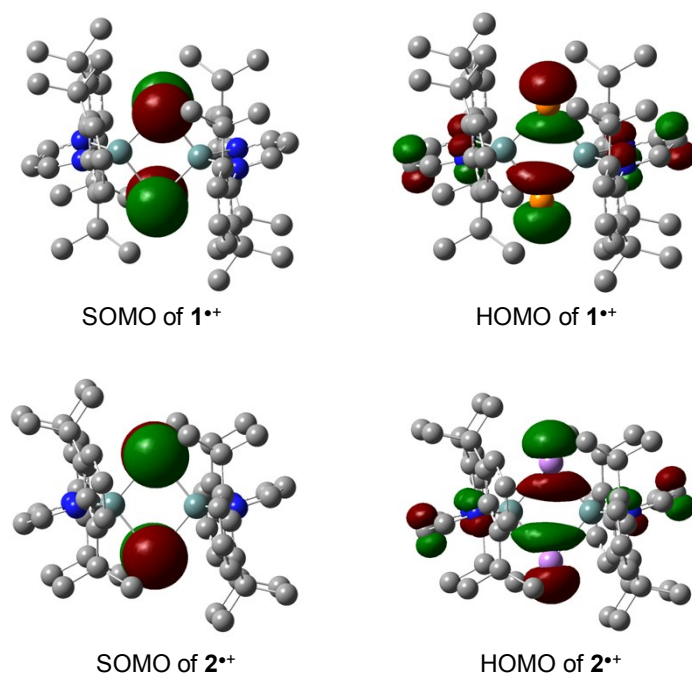

**Fig. S4** Selected molecular orbitals of **1<sup>•+</sup>** and **2<sup>•+</sup>**.

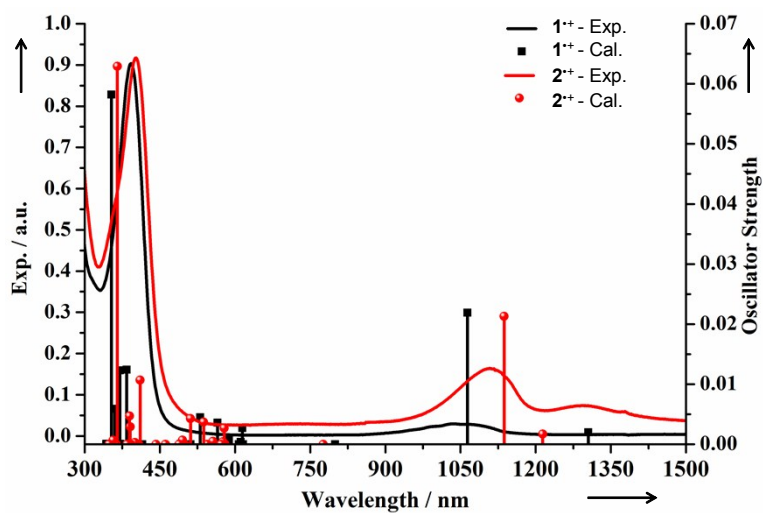

**Fig. S5** UV/Vis spectra of **1<sup>+</sup>** and **2<sup>+</sup>** in fluorobenzene solution at room temperature, together with transitions calculated at the UB3LYP/6-31G(d) level of theory.



Calculation details for the electron occupation of 3s and 3p orbitals in  $\mathbf{1}^{*+}$ .

$$\rho(^{31}\text{P}(3\text{s})) = a_{\text{iso}}/A = 43.7 \times 2.8 / 13306 = 0.9\%$$

$$\rho(^{31}\text{P}(3\text{p})) = \frac{\frac{1}{3}(a_{\perp} - a_{\parallel})}{\frac{2}{5}P} = \frac{\frac{1}{3}(153-19) \times 2.8}{\frac{2}{5} \times 917} = 34.1\%$$

$A$  (in MHz) is the isotropic hyperfine interaction for unit spin density in the corresponding s orbital.

$P$  (in MHz) is the anisotropic hyperfine parameter including the angular factor.

$A$  and  $P$  values could be obtained from Table 1 in the reference.<sup>S4</sup>

## DFT calculations

All the calculations were performed at Gaussian 09 program suite.<sup>S5</sup> The calculations were carried out with Becke's three-parameter hybrid exchange functional and the Lee–Yang–Parr correlation functional (B3LYP)<sup>S6</sup> combined with the SDD<sup>S7</sup> basis set, which was used for Ge. The ground-state structures of the studied compounds were optimized at the (U)B3LYP/6-31G(d)+SDD level of approximation, including two neutral compounds **1** and **2**, as well as their corresponding oxidation states (**1**<sup>+</sup> and **2**<sup>+</sup>), and no imaginary frequency was found, which confirmed the local minimum of the optimized structures. Besides, we also carried out the calculation on the UV/Vis absorption spectra of **1**<sup>+</sup> and **2**<sup>+</sup> according to the time-dependent DFT (TD-DFT) method at the UB3LYP/6-31(d)+SDD level,<sup>S8</sup> and the calculated results are in good agreement with the experimental value. In addition, considering the solvent effects, the Polarizable Continuum Model (PCM) model was used in the TD-DFT calculations.<sup>S9</sup>

**Table S2.** Calculated *g* values and hyperfine coupling constants (*G*) of **1**<sup>+</sup> and **2**<sup>+</sup> at the UB3LYP/def2TZVP level in comparison with the experimental results.

|                       |            | <i>g<sub>x</sub></i> | <i>g<sub>y</sub></i> | <i>g<sub>z</sub></i> | <i>a<sub>x</sub></i> | <i>a<sub>y</sub></i> | <i>a<sub>z</sub></i> |
|-----------------------|------------|----------------------|----------------------|----------------------|----------------------|----------------------|----------------------|
| <b>1</b> <sup>+</sup> | Exp.       | 2.0145               | 2.0145               | 2.0036               | 19                   | 19                   | 153                  |
|                       | Calculated | 2.0036               | 2.0123               | 2.0194               | 66.3                 | 62.7                 | 129.0                |
| <b>2</b> <sup>+</sup> | Exp.       | 2.0393               | 2.0793               | 2.0031               | 44                   | 44                   | 126                  |
|                       | Calculated | 2.0049               | 2.0363               | 2.0694               | 55.4                 | 53.2                 | 108.6                |

**Table S3.** Calculated Ge–E distances, Ge–E Wiberg bond indices, NBO charges at the (U)B3LYP/6-31G(d)+SDD level of theory.

|                      | Ge–E/Å                                                                    | WBI(Ge–E) | q(Ge) | q(E)  |
|----------------------|---------------------------------------------------------------------------|-----------|-------|-------|
| <b>1</b>             | 2.33853/2.33950<br>(2.2658(5)/ 2.2717(5)) <sup>a</sup>                    | 1.15/1.17 | 1.15  | -0.76 |
| <b>2</b>             | 2.44096/2.44022<br>2.44093/2.44021<br>(2.3668(4)/ 2.3733(4)) <sup>a</sup> | 1.16/1.15 | 1.05  | -0.65 |
| <b>1<sup>+</sup></b> | 2.34915/2.35942<br>2.34907/2.35940<br>(2.278(2)/2.3110(19)) <sup>a</sup>  | 1.12/1.14 | 0.56  | 0.07  |
| <b>2<sup>+</sup></b> | 2.46043/2.45187<br>(2.3825(13)/2.4085(12)) <sup>a</sup>                   | 1.14/1.12 | 0.51  | 0.13  |

<sup>a</sup> Experimental bond lengths.

**Table S4.** Calculated excited wavelengths ( $\lambda$ ) and oscillator strengths ( $f$ ) of selected transitions of **1<sup>+</sup>** and **2<sup>+</sup>**.

| Compound             | Excited state  | Wavelength/nm | $f$   | Transition nature                 |       |
|----------------------|----------------|---------------|-------|-----------------------------------|-------|
| <b>1<sup>+</sup></b> | S <sub>1</sub> | 1305.1        | 0.002 | HOMO-1( $\beta$ )→LUMO( $\beta$ ) | 91.9% |
|                      | S <sub>2</sub> | 1064.0        | 0.022 | HOMO( $\beta$ )→LUMO( $\beta$ )   | 96.6% |
| <b>2<sup>+</sup></b> | S <sub>1</sub> | 1214.0        | 0.002 | HOMO-1( $\beta$ )→LUMO( $\beta$ ) | 95.1% |
|                      | S <sub>2</sub> | 1137.0        | 0.021 | HOMO( $\beta$ )→LUMO( $\beta$ )   | 96.7% |

**Table S5.** Main frontier molecular orbitals related to UV/vis absorption transitions of  $1^{+}$  and  $2^{+}$ .

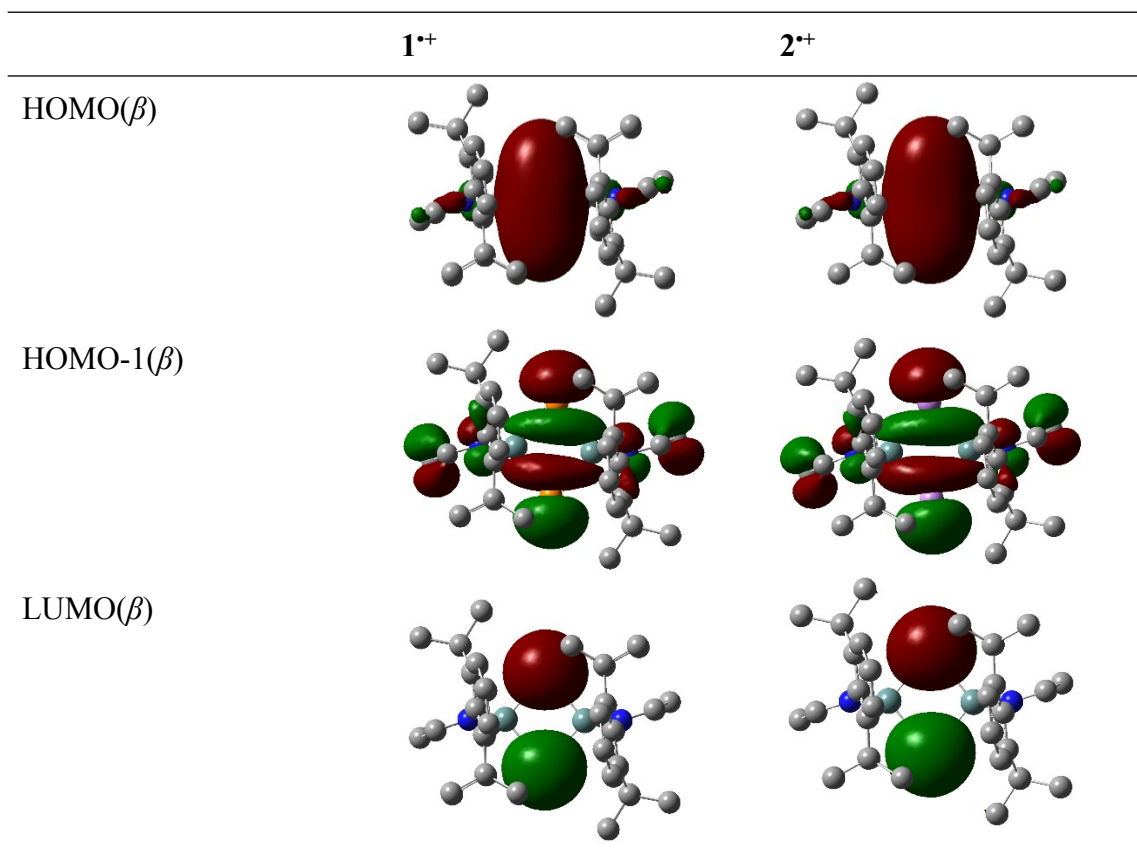

## Coordinates of the studied molecules

1<sup>+</sup>

---

| Center<br>Number | Atomic<br>Number | Atomic<br>Type | Coordinates (Angstroms) |           |           |
|------------------|------------------|----------------|-------------------------|-----------|-----------|
|                  |                  |                | X                       | Y         | Z         |
| 1                | 32               | 0              | 0.000131                | 1.418884  | 0.508892  |
| 2                | 32               | 0              | -0.000196               | -1.418910 | -0.508842 |
| 3                | 15               | 0              | 0.000052                | -0.618077 | 1.699503  |
| 4                | 15               | 0              | -0.000235               | 0.618035  | -1.699530 |
| 5                | 7                | 0              | 1.449153                | 2.724329  | 1.014096  |
| 6                | 7                | 0              | -1.448562               | 2.724685  | 1.014150  |
| 7                | 7                | 0              | -1.449128               | -2.724426 | -1.014110 |
| 8                | 7                | 0              | 1.448583                | -2.724630 | -1.014120 |
| 9                | 6                | 0              | -1.225407               | 3.750535  | 1.835872  |
| 10               | 6                | 0              | 0.000491                | 4.201352  | 2.312587  |
| 11               | 6                | 0              | 1.226260                | 3.750246  | 1.835814  |
| 12               | 6                | 0              | 2.817509                | 2.587348  | 0.539316  |
| 13               | 6                | 0              | 3.768655                | 1.944850  | 1.363074  |
| 14               | 6                | 0              | 5.096679                | 1.917072  | 0.917190  |
| 15               | 6                | 0              | 5.469337                | 2.514162  | -0.282989 |
| 16               | 6                | 0              | 4.516147                | 3.157730  | -1.067581 |
| 17               | 6                | 0              | 3.171867                | 3.210790  | -0.679053 |
| 18               | 6                | 0              | 3.419945                | 1.372449  | 2.735497  |
| 19               | 6                | 0              | 3.870761                | 2.326306  | 3.863225  |
| 20               | 6                | 0              | 4.009601                | -0.028773 | 2.963152  |
| 21               | 6                | 0              | 2.172420                | 4.007891  | -1.515090 |
| 22               | 6                | 0              | 2.264148                | 3.711628  | -3.022663 |

---

|    |   |   |           |           |           |
|----|---|---|-----------|-----------|-----------|
| 23 | 6 | 0 | 2.332180  | 5.520270  | -1.249360 |
| 24 | 6 | 0 | -2.816965 | 2.587920  | 0.539483  |
| 25 | 6 | 0 | -3.768054 | 1.945382  | 1.363284  |
| 26 | 6 | 0 | -5.096111 | 1.917651  | 0.917509  |
| 27 | 6 | 0 | -5.468865 | 2.514889  | -0.282575 |
| 28 | 6 | 0 | -4.515744 | 3.158536  | -1.067174 |
| 29 | 6 | 0 | -3.171415 | 3.211508  | -0.678781 |
| 30 | 6 | 0 | -3.419216 | 1.372934  | 2.735651  |
| 31 | 6 | 0 | -4.009027 | -0.028204 | 2.963453  |
| 32 | 6 | 0 | -3.869720 | 2.326900  | 3.863418  |
| 33 | 6 | 0 | -2.172031 | 4.008575  | -1.514908 |
| 34 | 6 | 0 | -2.331794 | 5.520968  | -1.249217 |
| 35 | 6 | 0 | -2.263870 | 3.712160  | -3.022450 |
| 36 | 6 | 0 | -1.226183 | -3.749972 | -1.836264 |
| 37 | 6 | 0 | -0.000379 | -4.200800 | -2.313223 |
| 38 | 6 | 0 | 1.225491  | -3.750159 | -1.836261 |
| 39 | 6 | 0 | -2.817480 | -2.587544 | -0.539344 |
| 40 | 6 | 0 | -3.768665 | -1.945043 | -1.363076 |
| 41 | 6 | 0 | -5.096700 | -1.917392 | -0.917207 |
| 42 | 6 | 0 | -5.469316 | -2.514529 | 0.282965  |
| 43 | 6 | 0 | -4.516080 | -3.158035 | 1.067549  |
| 44 | 6 | 0 | -3.171808 | -3.211025 | 0.679012  |
| 45 | 6 | 0 | -3.420010 | -1.372411 | -2.735417 |
| 46 | 6 | 0 | -4.009773 | 0.028813  | -2.962810 |
| 47 | 6 | 0 | -3.870761 | -2.326031 | -3.863335 |
| 48 | 6 | 0 | -2.172296 | -4.008103 | 1.514991  |
| 49 | 6 | 0 | -2.331919 | -5.520473 | 1.249075  |
| 50 | 6 | 0 | -2.264066 | -3.711971 | 3.022578  |
| 51 | 6 | 0 | 2.816967  | -2.587895 | -0.539431 |
| 52 | 6 | 0 | 3.171298  | -3.211314 | 0.678953  |

|    |   |   |           |           |           |
|----|---|---|-----------|-----------|-----------|
| 53 | 6 | 0 | 4.515620  | -3.158540 | 1.067367  |
| 54 | 6 | 0 | 5.468878  | -2.515171 | 0.282702  |
| 55 | 6 | 0 | 5.096243  | -1.917998 | -0.917446 |
| 56 | 6 | 0 | 3.768186  | -1.945548 | -1.363245 |
| 57 | 6 | 0 | 2.171726  | -4.008098 | 1.515142  |
| 58 | 6 | 0 | 2.263796  | -3.711809 | 3.022686  |
| 59 | 6 | 0 | 2.330947  | -5.520521 | 1.249335  |
| 60 | 6 | 0 | 3.419524  | -1.372987 | -2.735622 |
| 61 | 6 | 0 | 4.009434  | 0.028150  | -2.963139 |
| 62 | 6 | 0 | 3.870173  | -2.326788 | -3.863442 |
| 63 | 1 | 0 | 2.330981  | 1.275433  | 2.796316  |
| 64 | 1 | 0 | 3.595310  | 1.915750  | 4.841296  |
| 65 | 1 | 0 | 4.958464  | 2.460502  | 3.848566  |
| 66 | 1 | 0 | 3.416087  | 3.319281  | 3.776784  |
| 67 | 1 | 0 | 3.634763  | -0.440526 | 3.907021  |
| 68 | 1 | 0 | 5.103061  | -0.005923 | 3.031557  |
| 69 | 1 | 0 | 3.737781  | -0.713958 | 2.156769  |
| 70 | 1 | 0 | 1.163581  | 3.727744  | -1.193798 |
| 71 | 1 | 0 | 2.149430  | 2.643111  | -3.229710 |
| 72 | 1 | 0 | 1.470517  | 4.247592  | -3.555477 |
| 73 | 1 | 0 | 3.218033  | 4.041869  | -3.448388 |
| 74 | 1 | 0 | 2.194489  | 5.765243  | -0.190218 |
| 75 | 1 | 0 | 1.595533  | 6.091215  | -1.826346 |
| 76 | 1 | 0 | 3.330354  | 5.865549  | -1.542004 |
| 77 | 1 | 0 | -2.330259 | 1.275767  | 2.796328  |
| 78 | 1 | 0 | -3.633632 | -0.440208 | 3.906989  |
| 79 | 1 | 0 | -3.737907 | -0.713300 | 2.156758  |
| 80 | 1 | 0 | -5.102435 | -0.005125 | 3.032617  |
| 81 | 1 | 0 | -3.594323 | 1.916275  | 4.841475  |
| 82 | 1 | 0 | -3.414784 | 3.319751  | 3.776939  |

|     |   |   |           |           |           |
|-----|---|---|-----------|-----------|-----------|
| 83  | 1 | 0 | -4.957388 | 2.461383  | 3.848814  |
| 84  | 1 | 0 | -1.163167 | 3.728476  | -1.193670 |
| 85  | 1 | 0 | -3.330026 | 5.866248  | -1.541667 |
| 86  | 1 | 0 | -2.193928 | 5.765962  | -0.190101 |
| 87  | 1 | 0 | -1.595267 | 6.091931  | -1.826337 |
| 88  | 1 | 0 | -3.217846 | 4.042225  | -3.448092 |
| 89  | 1 | 0 | -2.149039 | 2.643620  | -3.229344 |
| 90  | 1 | 0 | -1.470366 | 4.248157  | -3.555428 |
| 91  | 1 | 0 | -2.331056 | -1.275272 | -2.796225 |
| 92  | 1 | 0 | -3.737895 | 0.713936  | -2.156396 |
| 93  | 1 | 0 | -3.635116 | 0.440709  | -3.906690 |
| 94  | 1 | 0 | -5.103250 | 0.005892  | -3.031045 |
| 95  | 1 | 0 | -3.416081 | -3.319023 | -3.777127 |
| 96  | 1 | 0 | -3.595345 | -1.915220 | -4.841308 |
| 97  | 1 | 0 | -4.958470 | -2.460275 | -3.848717 |
| 98  | 1 | 0 | -1.163484 | -3.727821 | 1.193735  |
| 99  | 1 | 0 | -1.595201 | -6.091438 | 1.825950  |
| 100 | 1 | 0 | -3.330048 | -5.865890 | 1.541708  |
| 101 | 1 | 0 | -2.194249 | -5.765286 | 0.189896  |
| 102 | 1 | 0 | -1.470505 | -4.248040 | 3.555393  |
| 103 | 1 | 0 | -3.217992 | -4.042147 | 3.448259  |
| 104 | 1 | 0 | -2.149260 | -2.643472 | 3.229702  |
| 105 | 1 | 0 | 1.162929  | -3.727622 | 1.194003  |
| 106 | 1 | 0 | 1.470225  | -4.247648 | 3.555717  |
| 107 | 1 | 0 | 3.217732  | -4.042117 | 3.448237  |
| 108 | 1 | 0 | 2.149251  | -2.643256 | 3.229678  |
| 109 | 1 | 0 | 1.594199  | -6.091257 | 1.826397  |
| 110 | 1 | 0 | 3.329043  | -5.866182 | 1.541793  |
| 111 | 1 | 0 | 2.193008  | -5.765373 | 0.190199  |
| 112 | 1 | 0 | 2.330578  | -1.275758 | -2.796409 |



|     |   |   |           |           |           |
|-----|---|---|-----------|-----------|-----------|
| 113 | 1 | 0 | 3.737816  | 0.713270  | -2.156641 |
| 114 | 1 | 0 | 5.102888  | 0.005079  | -3.031639 |
| 115 | 1 | 0 | 3.634631  | 0.440098  | -3.906941 |
| 116 | 1 | 0 | 3.415150  | -3.319624 | -3.777243 |
| 117 | 1 | 0 | 3.594969  | -1.915974 | -4.841477 |
| 118 | 1 | 0 | 4.957825  | -2.461339 | -3.848673 |
| 119 | 1 | 0 | -5.852073 | 1.437096  | 1.530335  |
| 120 | 1 | 0 | -6.507327 | 2.491832  | -0.601067 |
| 121 | 1 | 0 | -4.822811 | 3.638851  | -1.990921 |
| 122 | 1 | 0 | -2.113862 | 4.310674  | 2.123804  |
| 123 | 1 | 0 | 0.000608  | 5.045417  | 2.990388  |
| 124 | 1 | 0 | 2.114850  | 4.310193  | 2.123695  |
| 125 | 1 | 0 | 5.852680  | 1.436553  | 1.529997  |
| 126 | 1 | 0 | 6.507774  | 2.491080  | -0.601559 |
| 127 | 1 | 0 | 4.823121  | 3.637944  | -1.991408 |
| 128 | 1 | 0 | -4.823025 | -3.638269 | 1.991376  |
| 129 | 1 | 0 | -6.507753 | -2.491512 | 0.601541  |
| 130 | 1 | 0 | -5.852750 | -1.436959 | -1.530025 |
| 131 | 1 | 0 | -2.114731 | -4.309890 | -2.124340 |
| 132 | 1 | 0 | -0.000447 | -5.044624 | -2.991325 |
| 133 | 1 | 0 | 2.113961  | -4.310200 | -2.124327 |
| 134 | 1 | 0 | 4.822580  | -3.638827 | 1.991164  |
| 135 | 1 | 0 | 6.507340  | -2.492278 | 0.601204  |
| 136 | 1 | 0 | 5.852287  | -1.437586 | -1.530280 |

-----

----

-----

---

| Center<br>Number | Atomic<br>Number | Atomic<br>Type | Coordinates (Angstroms) |           |           |
|------------------|------------------|----------------|-------------------------|-----------|-----------|
|                  |                  |                | X                       | Y         | Z         |
| 1                | 32               | 0              | 0.000205                | -1.457900 | -0.541317 |
| 2                | 7                | 0              | -1.449505               | -2.766914 | -1.059979 |
| 3                | 7                | 0              | 1.450359                | -2.766449 | -1.060016 |
| 4                | 33               | 0              | 0.000060                | -0.668050 | 1.779848  |
| 5                | 6                | 0              | -1.226639               | -3.791478 | -1.882185 |
| 6                | 6                | 0              | 0.000658                | -4.242057 | -2.357741 |
| 7                | 6                | 0              | 1.227831                | -3.791083 | -1.882216 |
| 8                | 6                | 0              | -2.813560               | -2.618838 | -0.580916 |
| 9                | 6                | 0              | -3.169039               | -3.240317 | 0.637958  |
| 10               | 6                | 0              | -4.508611               | -3.163740 | 1.038618  |
| 11               | 6                | 0              | -5.455959               | -2.498561 | 0.264946  |
| 12               | 6                | 0              | -5.082111               | -1.901759 | -0.935253 |
| 13               | 6                | 0              | -3.758531               | -1.951538 | -1.392013 |
| 14               | 6                | 0              | -2.175898               | -4.057185 | 1.462328  |
| 15               | 6                | 0              | -2.230468               | -3.744695 | 2.968364  |
| 16               | 6                | 0              | -2.380448               | -5.566795 | 1.212601  |
| 17               | 6                | 0              | -3.406294               | -1.374269 | -2.761631 |
| 18               | 6                | 0              | -3.985039               | 0.032402  | -2.984791 |
| 19               | 6                | 0              | -3.862523               | -2.320302 | -3.893609 |
| 20               | 6                | 0              | 2.814357                | -2.617874 | -0.580998 |
| 21               | 6                | 0              | 3.170139                | -3.239294 | 0.637830  |
| 22               | 6                | 0              | 4.509703                | -3.162242 | 1.038424  |
| 23               | 6                | 0              | 5.456730                | -2.496561 | 0.264789  |

-----

---

|    |    |   |           |           |           |
|----|----|---|-----------|-----------|-----------|
| 24 | 6  | 0 | 5.082590  | -1.899795 | -0.935339 |
| 25 | 6  | 0 | 3.759032  | -1.950152 | -1.392094 |
| 26 | 6  | 0 | 2.177332  | -4.056608 | 1.462163  |
| 27 | 6  | 0 | 2.382501  | -5.566134 | 1.212451  |
| 28 | 6  | 0 | 2.231671  | -3.744159 | 2.968220  |
| 29 | 6  | 0 | 3.406529  | -1.373106 | -2.761732 |
| 30 | 6  | 0 | 3.862789  | -2.319262 | -3.893610 |
| 31 | 6  | 0 | 3.985016  | 0.033604  | -2.985296 |
| 32 | 32 | 0 | -0.000243 | 1.457909  | 0.541289  |
| 33 | 7  | 0 | 1.449525  | 2.766864  | 1.060023  |
| 34 | 7  | 0 | -1.450321 | 2.766574  | 1.059864  |
| 35 | 33 | 0 | -0.000195 | 0.668062  | -1.779871 |
| 36 | 6  | 0 | 1.226692  | 3.791307  | 1.882390  |
| 37 | 6  | 0 | -0.000613 | 4.241886  | 2.357934  |
| 38 | 6  | 0 | -1.227780 | 3.791053  | 1.882261  |
| 39 | 6  | 0 | 2.813592  | 2.618703  | 0.581051  |
| 40 | 6  | 0 | 3.169246  | 3.240204  | -0.637764 |
| 41 | 6  | 0 | 4.508836  | 3.163435  | -1.038333 |
| 42 | 6  | 0 | 5.456020  | 2.498012  | -0.264660 |
| 43 | 6  | 0 | 5.081999  | 1.901207  | 0.935479  |
| 44 | 6  | 0 | 3.758403  | 1.951216  | 1.392169  |
| 45 | 6  | 0 | 2.176300  | 4.057357  | -1.462109 |
| 46 | 6  | 0 | 2.230393  | 3.744551  | -2.968096 |
| 47 | 6  | 0 | 2.381548  | 5.566919  | -1.212697 |
| 48 | 6  | 0 | 3.406002  | 1.374031  | 2.761767  |
| 49 | 6  | 0 | 3.984335  | -0.032797 | 2.984949  |
| 50 | 6  | 0 | 3.862514  | 2.319931  | 3.893757  |
| 51 | 6  | 0 | -2.814326 | 2.618076  | 0.580833  |
| 52 | 6  | 0 | -3.170031 | 3.239460  | -0.638031 |
| 53 | 6  | 0 | -4.509606 | 3.162581  | -1.038616 |

|    |   |   |           |           |           |
|----|---|---|-----------|-----------|-----------|
| 54 | 6 | 0 | -5.456751 | 2.497177  | -0.264896 |
| 55 | 6 | 0 | -5.082701 | 1.900482  | 0.935293  |
| 56 | 6 | 0 | -3.759112 | 1.950584  | 1.391995  |
| 57 | 6 | 0 | -2.177149 | 4.056630  | -1.462420 |
| 58 | 6 | 0 | -2.382131 | 5.566187  | -1.212750 |
| 59 | 6 | 0 | -2.231613 | 3.744075  | -2.968446 |
| 60 | 6 | 0 | -3.406743 | 1.373494  | 2.761661  |
| 61 | 6 | 0 | -3.863450 | 2.319420  | 3.893526  |
| 62 | 6 | 0 | -3.984913 | -0.033410 | 2.984901  |
| 63 | 1 | 0 | -1.166460 | -3.806434 | 1.119352  |
| 64 | 1 | 0 | -1.454007 | -4.311828 | 3.494362  |
| 65 | 1 | 0 | -2.062151 | -2.680484 | 3.162094  |
| 66 | 1 | 0 | -3.191854 | -4.025186 | 3.412034  |
| 67 | 1 | 0 | -1.646324 | -6.152499 | 1.777891  |
| 68 | 1 | 0 | -2.272170 | -5.822243 | 0.152505  |
| 69 | 1 | 0 | -3.380569 | -5.884503 | 1.528915  |
| 70 | 1 | 0 | -2.316395 | -1.283846 | -2.820475 |
| 71 | 1 | 0 | -3.607795 | 0.443231  | -3.928174 |
| 72 | 1 | 0 | -3.706622 | 0.714175  | -2.177563 |
| 73 | 1 | 0 | -5.078661 | 0.018957  | -3.052590 |
| 74 | 1 | 0 | -3.584182 | -1.907860 | -4.870111 |
| 75 | 1 | 0 | -3.414311 | -3.316426 | -3.810483 |
| 76 | 1 | 0 | -4.951126 | -2.447371 | -3.879580 |
| 77 | 1 | 0 | 1.167797  | -3.806291 | 1.119162  |
| 78 | 1 | 0 | 3.382787  | -5.883394 | 1.528703  |
| 79 | 1 | 0 | 1.648672  | -6.152119 | 1.777834  |
| 80 | 1 | 0 | 2.274242  | -5.821696 | 0.152381  |
| 81 | 1 | 0 | 2.062894  | -2.680031 | 3.162018  |
| 82 | 1 | 0 | 3.193146  | -4.024278 | 3.411946  |
| 83 | 1 | 0 | 1.455425  | -4.311677 | 3.494118  |

|     |   |   |           |           |           |
|-----|---|---|-----------|-----------|-----------|
| 84  | 1 | 0 | 2.316607  | -1.282865 | -2.820448 |
| 85  | 1 | 0 | 3.584331  | -1.907012 | -4.870161 |
| 86  | 1 | 0 | 4.951409  | -2.446183 | -3.879627 |
| 87  | 1 | 0 | 3.414729  | -3.315442 | -3.810320 |
| 88  | 1 | 0 | 3.607570  | 0.444113  | -3.928738 |
| 89  | 1 | 0 | 5.078633  | 0.020311  | -3.053256 |
| 90  | 1 | 0 | 3.706599  | 0.715554  | -2.178227 |
| 91  | 1 | 0 | 1.166818  | 3.807128  | -1.118883 |
| 92  | 1 | 0 | 3.191792  | 4.024554  | -3.412045 |
| 93  | 1 | 0 | 1.454048  | 4.311914  | -3.494018 |
| 94  | 1 | 0 | 2.061586  | 2.680374  | -3.161590 |
| 95  | 1 | 0 | 3.381704  | 5.884160  | -1.529367 |
| 96  | 1 | 0 | 1.647490  | 6.152826  | -1.777864 |
| 97  | 1 | 0 | 2.273694  | 5.822592  | -0.152611 |
| 98  | 1 | 0 | 2.316080  | 1.283933  | 2.820649  |
| 99  | 1 | 0 | 3.705663  | -0.714524 | 2.177782  |
| 100 | 1 | 0 | 5.077972  | -0.019676 | 3.052659  |
| 101 | 1 | 0 | 3.607028  | -0.443454 | 3.928379  |
| 102 | 1 | 0 | 4.951184  | 2.446452  | 3.879898  |
| 103 | 1 | 0 | 3.583804  | 1.907687  | 4.870238  |
| 104 | 1 | 0 | 3.414811  | 3.316270  | 3.810462  |
| 105 | 1 | 0 | -1.167631 | 3.806219  | -1.119419 |
| 106 | 1 | 0 | -1.648263 | 6.152079  | -1.778178 |
| 107 | 1 | 0 | -2.273770 | 5.821739  | -0.152689 |
| 108 | 1 | 0 | -3.382393 | 5.883570  | -1.528943 |
| 109 | 1 | 0 | -1.455149 | 4.311229  | -3.494417 |
| 110 | 1 | 0 | -2.063253 | 2.679864  | -3.162149 |
| 111 | 1 | 0 | -3.192986 | 4.024526  | -3.412176 |
| 112 | 1 | 0 | -2.316815 | 1.283527  | 2.820619  |
| 113 | 1 | 0 | -4.952067 | 2.446308  | 3.879222  |

|     |   |   |           |           |           |
|-----|---|---|-----------|-----------|-----------|
| 114 | 1 | 0 | -3.415394 | 3.315626  | 3.810501  |
| 115 | 1 | 0 | -3.585261 | 1.907029  | 4.870097  |
| 116 | 1 | 0 | -3.706158 | -0.715139 | 2.177769  |
| 117 | 1 | 0 | -3.607513 | -0.443981 | 3.928332  |
| 118 | 1 | 0 | -5.078540 | -0.020430 | 3.052667  |
| 119 | 1 | 0 | 2.116148  | -4.350662 | -2.172568 |
| 120 | 1 | 0 | 0.000773  | -5.085712 | -3.036100 |
| 121 | 1 | 0 | -2.114786 | -4.351332 | -2.172540 |
| 122 | 1 | 0 | 2.114859  | 4.351048  | 2.172901  |
| 123 | 1 | 0 | -0.000735 | 5.085435  | 3.036424  |
| 124 | 1 | 0 | -2.116083 | 4.350647  | 2.172635  |
| 125 | 1 | 0 | 5.833689  | 1.401818  | 1.538370  |
| 126 | 1 | 0 | 6.491159  | 2.456675  | -0.592037 |
| 127 | 1 | 0 | 4.817313  | 3.642583  | -1.962353 |
| 128 | 1 | 0 | 4.818264  | -3.641278 | 1.962471  |
| 129 | 1 | 0 | 6.491850  | -2.454957 | 0.592193  |
| 130 | 1 | 0 | -4.816943 | -3.642841 | 1.962711  |
| 131 | 1 | 0 | -6.491085 | -2.457387 | 0.592382  |
| 132 | 1 | 0 | -5.833934 | -1.402555 | -1.538130 |
| 133 | 1 | 0 | -5.834386 | 1.401137  | 1.538223  |
| 134 | 1 | 0 | -6.491889 | 2.455779  | -0.592269 |
| 135 | 1 | 0 | -4.818101 | 3.641623  | -1.962685 |
| 136 | 1 | 0 | 5.834177  | -1.400164 | -1.538156 |

-----

--

**1**

-----

---

| Center | Atomic | Atomic | Coordinates (Angstroms) |  |  |
|--------|--------|--------|-------------------------|--|--|
|--------|--------|--------|-------------------------|--|--|

| Number | Number | Type |           | X         | Y         |
|--------|--------|------|-----------|-----------|-----------|
| Z      |        |      |           |           |           |
| -----  |        |      |           |           |           |
|        |        |      |           |           |           |
| 1      | 32     | 0    | -0.000040 | 1.346673  | -0.480469 |
| 2      | 32     | 0    | 0.000104  | -1.346650 | 0.480381  |
| 3      | 15     | 0    | -0.000294 | -0.622742 | -1.743278 |
| 4      | 15     | 0    | 0.000397  | 0.622760  | 1.743194  |
| 5      | 7      | 0    | -1.454306 | 2.728233  | -1.014701 |
| 6      | 7      | 0    | 1.453916  | 2.728462  | -1.014634 |
| 7      | 7      | 0    | 1.454269  | -2.728230 | 1.014652  |
| 8      | 7      | 0    | -1.453972 | -2.728369 | 1.014609  |
| 9      | 6      | 0    | 1.228881  | 3.713764  | -1.877037 |
| 10     | 6      | 0    | -0.000286 | 4.142100  | -2.372736 |
| 11     | 6      | 0    | -1.229418 | 3.713597  | -1.877041 |
| 12     | 6      | 0    | -2.821000 | 2.616583  | -0.547687 |
| 13     | 6      | 0    | -3.786194 | 1.980112  | -1.360774 |
| 14     | 6      | 0    | -5.115136 | 1.977771  | -0.915310 |
| 15     | 6      | 0    | -5.479756 | 2.586588  | 0.280941  |
| 16     | 6      | 0    | -4.513966 | 3.215690  | 1.061850  |
| 17     | 6      | 0    | -3.170392 | 3.244183  | 0.669979  |
| 18     | 6      | 0    | -3.446620 | 1.373247  | -2.720513 |
| 19     | 6      | 0    | -3.901585 | 2.298523  | -3.869812 |
| 20     | 6      | 0    | -4.040285 | -0.032033 | -2.907797 |
| 21     | 6      | 0    | -2.152581 | 4.018922  | 1.503337  |
| 22     | 6      | 0    | -2.240774 | 3.715037  | 3.008687  |
| 23     | 6      | 0    | -2.281919 | 5.534243  | 1.240574  |
| 24     | 6      | 0    | 2.820678  | 2.616977  | -0.547764 |
| 25     | 6      | 0    | 3.785867  | 1.980531  | -1.360884 |
| 26     | 6      | 0    | 5.114838  | 1.978309  | -0.915516 |

|    |   |   |           |           |           |
|----|---|---|-----------|-----------|-----------|
| 27 | 6 | 0 | 5.479519  | 2.587289  | 0.280637  |
| 28 | 6 | 0 | 4.513750  | 3.216383  | 1.061562  |
| 29 | 6 | 0 | 3.170132  | 3.244711  | 0.669807  |
| 30 | 6 | 0 | 3.446267  | 1.373487  | -2.720533 |
| 31 | 6 | 0 | 4.040010  | -0.031782 | -2.907654 |
| 32 | 6 | 0 | 3.901130  | 2.298652  | -3.869961 |
| 33 | 6 | 0 | 2.152337  | 4.019456  | 1.503171  |
| 34 | 6 | 0 | 2.281922  | 5.534812  | 1.240665  |
| 35 | 6 | 0 | 2.240353  | 3.715303  | 3.008475  |
| 36 | 6 | 0 | 1.229332  | -3.713624 | 1.876958  |
| 37 | 6 | 0 | 0.000197  | -4.142114 | 2.372631  |
| 38 | 6 | 0 | -1.228972 | -3.713678 | 1.877009  |
| 39 | 6 | 0 | 2.820992  | -2.616665 | 0.547677  |
| 40 | 6 | 0 | 3.786169  | -1.980202 | 1.360777  |
| 41 | 6 | 0 | 5.115131  | -1.977928 | 0.915380  |
| 42 | 6 | 0 | 5.479804  | -2.586894 | -0.280786 |
| 43 | 6 | 0 | 4.514040  | -3.216044 | -1.061679 |
| 44 | 6 | 0 | 3.170432  | -3.244408 | -0.669907 |
| 45 | 6 | 0 | 3.446555  | -1.373276 | 2.720483  |
| 46 | 6 | 0 | 4.040279  | 0.031984  | 2.907703  |
| 47 | 6 | 0 | 3.901412  | -2.298514 | 3.869840  |
| 48 | 6 | 0 | 2.152675  | -4.019234 | -1.503258 |
| 49 | 6 | 0 | 2.282125  | -5.534542 | -1.240446 |
| 50 | 6 | 0 | 2.240871  | -3.715355 | -3.008615 |
| 51 | 6 | 0 | -2.820736 | -2.616797 | 0.547751  |
| 52 | 6 | 0 | -3.170200 | -3.244388 | -0.669915 |
| 53 | 6 | 0 | -4.513825 | -3.216055 | -1.061619 |
| 54 | 6 | 0 | -5.479592 | -2.587050 | -0.280602 |
| 55 | 6 | 0 | -5.114894 | -1.978187 | 0.915599  |
| 56 | 6 | 0 | -3.785910 | -1.980446 | 1.360950  |



|    |   |   |           |           |           |
|----|---|---|-----------|-----------|-----------|
| 57 | 6 | 0 | -2.152389 | -4.019009 | -1.503398 |
| 58 | 6 | 0 | -2.240868 | -3.715201 | -3.008748 |
| 59 | 6 | 0 | -2.281431 | -5.534334 | -1.240512 |
| 60 | 6 | 0 | -3.446288 | -1.373570 | 2.720691  |
| 61 | 6 | 0 | -4.039882 | 0.031733  | 2.907914  |
| 62 | 6 | 0 | -3.901280 | -2.298781 | 3.870003  |
| 63 | 1 | 0 | -2.360358 | 1.264385  | -2.779468 |
| 64 | 1 | 0 | -3.629216 | 1.863291  | -4.838800 |
| 65 | 1 | 0 | -4.989899 | 2.435321  | -3.856622 |
| 66 | 1 | 0 | -3.444017 | 3.292301  | -3.809056 |
| 67 | 1 | 0 | -3.683952 | -0.460044 | -3.851998 |
| 68 | 1 | 0 | -5.136200 | -0.014351 | -2.948625 |
| 69 | 1 | 0 | -3.738782 | -0.700179 | -2.098581 |
| 70 | 1 | 0 | -1.154813 | 3.714631  | 1.175024  |
| 71 | 1 | 0 | -2.119617 | 2.644588  | 3.198394  |
| 72 | 1 | 0 | -1.443345 | 4.246318  | 3.541941  |
| 73 | 1 | 0 | -3.193939 | 4.042707  | 3.440525  |
| 74 | 1 | 0 | -2.145476 | 5.774286  | 0.179964  |
| 75 | 1 | 0 | -1.528042 | 6.089639  | 1.811848  |
| 76 | 1 | 0 | -3.270785 | 5.902070  | 1.540372  |
| 77 | 1 | 0 | 2.360017  | 1.264522  | -2.779420 |
| 78 | 1 | 0 | 3.683914  | -0.459817 | -3.851933 |
| 79 | 1 | 0 | 3.738298  | -0.699919 | -2.098498 |
| 80 | 1 | 0 | 5.135935  | -0.014100 | -2.948208 |
| 81 | 1 | 0 | 3.628720  | 1.863302  | -4.838885 |
| 82 | 1 | 0 | 3.443541  | 3.292425  | -3.809299 |
| 83 | 1 | 0 | 4.989442  | 2.435471  | -3.856834 |
| 84 | 1 | 0 | 1.154554  | 3.715365  | 1.174719  |
| 85 | 1 | 0 | 3.270735  | 5.902482  | 1.540833  |
| 86 | 1 | 0 | 2.145851  | 5.775028  | 0.180048  |

|     |   |   |           |           |           |
|-----|---|---|-----------|-----------|-----------|
| 87  | 1 | 0 | 1.527935  | 6.090234  | 1.811769  |
| 88  | 1 | 0 | 3.193498  | 4.042832  | 3.440470  |
| 89  | 1 | 0 | 2.119109  | 2.644822  | 3.197966  |
| 90  | 1 | 0 | 1.442906  | 4.246530  | 3.541752  |
| 91  | 1 | 0 | 2.360295  | -1.264343 | 2.779356  |
| 92  | 1 | 0 | 3.738706  | 0.700136  | 2.098514  |
| 93  | 1 | 0 | 3.684049  | 0.460007  | 3.851934  |
| 94  | 1 | 0 | 5.136197  | 0.014280  | 2.948430  |
| 95  | 1 | 0 | 3.443814  | -3.292278 | 3.809103  |
| 96  | 1 | 0 | 3.629001  | -1.863222 | 4.838789  |
| 97  | 1 | 0 | 4.989723  | -2.435341 | 3.856717  |
| 98  | 1 | 0 | 1.154876  | -3.715030 | -1.174959 |
| 99  | 1 | 0 | 1.528240  | -6.090016 | -1.811635 |
| 100 | 1 | 0 | 3.270991  | -5.902330 | -1.540296 |
| 101 | 1 | 0 | 2.145783  | -5.774550 | -0.179814 |
| 102 | 1 | 0 | 1.443557  | -4.246775 | -3.541904 |
| 103 | 1 | 0 | 3.194112  | -4.042867 | -3.440407 |
| 104 | 1 | 0 | 2.119534  | -2.644922 | -3.198326 |
| 105 | 1 | 0 | -1.154620 | -3.714522 | -1.175274 |
| 106 | 1 | 0 | -1.443454 | -4.246382 | -3.542123 |
| 107 | 1 | 0 | -3.194054 | -4.043004 | -3.440444 |
| 108 | 1 | 0 | -2.119884 | -2.644731 | -3.198493 |
| 109 | 1 | 0 | -1.527464 | -6.089642 | -1.811752 |
| 110 | 1 | 0 | -3.270238 | -5.902356 | -1.540274 |
| 111 | 1 | 0 | -2.144935 | -5.774269 | -0.179885 |
| 112 | 1 | 0 | -2.360020 | -1.264741 | 2.779639  |
| 113 | 1 | 0 | -3.738204 | 0.699863  | 2.098743  |
| 114 | 1 | 0 | -5.135799 | 0.014142  | 2.948595  |
| 115 | 1 | 0 | -3.683639 | 0.459700  | 3.852163  |
| 116 | 1 | 0 | -3.443790 | -3.292594 | 3.809228  |

|     |   |   |           |           |           |
|-----|---|---|-----------|-----------|-----------|
| 117 | 1 | 0 | -3.628828 | -1.863547 | 4.838963  |
| 118 | 1 | 0 | -4.989607 | -2.435498 | 3.856873  |
| 119 | 1 | 0 | 5.876367  | 1.499739  | -1.523910 |
| 120 | 1 | 0 | 6.517924  | 2.578498  | 0.602014  |
| 121 | 1 | 0 | 4.808889  | 3.700803  | 1.987628  |
| 122 | 1 | 0 | 2.111663  | 4.270847  | -2.193143 |
| 123 | 1 | 0 | -0.000337 | 4.958355  | -3.084474 |
| 124 | 1 | 0 | -2.112269 | 4.270594  | -2.193117 |
| 125 | 1 | 0 | -5.876677 | 1.499186  | -1.523683 |
| 126 | 1 | 0 | -6.518135 | 2.577695  | 0.602397  |
| 127 | 1 | 0 | -4.809065 | 3.699974  | 1.987999  |
| 128 | 1 | 0 | 4.809173  | -3.700457 | -1.987752 |
| 129 | 1 | 0 | 6.518206  | -2.578091 | -0.602171 |
| 130 | 1 | 0 | 5.876657  | -1.499335 | 1.523760  |
| 131 | 1 | 0 | 2.112165  | -4.270651 | 2.193024  |
| 132 | 1 | 0 | 0.000239  | -4.958421 | 3.084310  |
| 133 | 1 | 0 | -2.111776 | -4.270691 | 2.193174  |
| 134 | 1 | 0 | -4.808983 | -3.700363 | -1.987737 |
| 135 | 1 | 0 | -6.518005 | -2.578253 | -0.601948 |
| 136 | 1 | 0 | -5.876415 | -1.499664 | 1.524042  |

-----  
 --

2

-----  
 ---

| Center | Atomic | Atomic | Coordinates (Angstroms) |   |   |
|--------|--------|--------|-------------------------|---|---|
| Number | Number | Type   | X                       | Y | Z |

--

---

|    |    |   |           |           |           |
|----|----|---|-----------|-----------|-----------|
| 1  | 32 | 0 | -0.000044 | 1.381602  | -0.508030 |
| 2  | 7  | 0 | 1.455297  | 2.765176  | -1.058048 |
| 3  | 7  | 0 | -1.455675 | 2.764983  | -1.058135 |
| 4  | 33 | 0 | 0.000061  | 0.671110  | 1.827206  |
| 5  | 6  | 0 | 1.230169  | 3.742658  | -1.928543 |
| 6  | 6  | 0 | -0.000266 | 4.166686  | -2.426632 |
| 7  | 6  | 0 | -1.230674 | 3.742527  | -1.928552 |
| 8  | 6  | 0 | 2.819274  | 2.646633  | -0.588431 |
| 9  | 6  | 0 | 3.169345  | 3.275159  | 0.628578  |
| 10 | 6  | 0 | 4.509566  | 3.229586  | 1.029865  |
| 11 | 6  | 0 | 5.471414  | 2.583128  | 0.258121  |
| 12 | 6  | 0 | 5.106043  | 1.972542  | -0.937109 |
| 13 | 6  | 0 | 3.779976  | 1.989862  | -1.390647 |
| 14 | 6  | 0 | 2.155391  | 4.067608  | 1.450055  |
| 15 | 6  | 0 | 2.225745  | 3.769688  | 2.957474  |
| 16 | 6  | 0 | 2.306887  | 5.579605  | 1.180768  |
| 17 | 6  | 0 | 3.437879  | 1.374936  | -2.746226 |
| 18 | 6  | 0 | 4.018815  | -0.037205 | -2.923017 |
| 19 | 6  | 0 | 3.901351  | 2.288059  | -3.901680 |
| 20 | 6  | 0 | -2.819592 | 2.646259  | -0.588419 |
| 21 | 6  | 0 | -3.169704 | 3.274900  | 0.628526  |
| 22 | 6  | 0 | -4.509906 | 3.229242  | 1.029844  |
| 23 | 6  | 0 | -5.471719 | 2.582644  | 0.258165  |
| 24 | 6  | 0 | -5.106323 | 1.972010  | -0.937033 |
| 25 | 6  | 0 | -3.780263 | 1.989367  | -1.390570 |
| 26 | 6  | 0 | -2.155855 | 4.067636  | 1.449849  |
| 27 | 6  | 0 | -2.307725 | 5.579581  | 1.180413  |
| 28 | 6  | 0 | -2.226005 | 3.769881  | 2.957318  |

|    |    |   |           |           |           |
|----|----|---|-----------|-----------|-----------|
| 29 | 6  | 0 | -3.438113 | 1.374411  | -2.746114 |
| 30 | 6  | 0 | -3.901511 | 2.287486  | -3.901612 |
| 31 | 6  | 0 | -4.019132 | -0.037721 | -2.922859 |
| 32 | 32 | 0 | 0.000098  | -1.381703 | 0.507890  |
| 33 | 7  | 0 | -1.455336 | -2.765190 | 1.058003  |
| 34 | 7  | 0 | 1.455698  | -2.765087 | 1.058012  |
| 35 | 33 | 0 | -0.000017 | -0.671196 | -1.827377 |
| 36 | 6  | 0 | -1.230216 | -3.742935 | 1.928204  |
| 37 | 6  | 0 | 0.000228  | -4.167213 | 2.426059  |
| 38 | 6  | 0 | 1.230637  | -3.742937 | 1.928081  |
| 39 | 6  | 0 | -2.819348 | -2.646520 | 0.588499  |
| 40 | 6  | 0 | -3.169607 | -3.275124 | -0.628437 |
| 41 | 6  | 0 | -4.509894 | -3.229580 | -1.029502 |
| 42 | 6  | 0 | -5.471621 | -2.583094 | -0.257635 |
| 43 | 6  | 0 | -5.106078 | -1.972477 | 0.937522  |
| 44 | 6  | 0 | -3.779948 | -1.989742 | 1.390841  |
| 45 | 6  | 0 | -2.155818 | -4.067697 | -1.449996 |
| 46 | 6  | 0 | -2.225967 | -3.769491 | -2.957382 |
| 47 | 6  | 0 | -2.307740 | -5.579706 | -1.181016 |
| 48 | 6  | 0 | -3.437641 | -1.374777 | 2.746330  |
| 49 | 6  | 0 | -4.018924 | 0.037205  | 2.923255  |
| 50 | 6  | 0 | -3.900584 | -2.288041 | 3.901897  |
| 51 | 6  | 0 | 2.819670  | -2.646254 | 0.588444  |
| 52 | 6  | 0 | 3.169982  | -3.274710 | -0.628526 |
| 53 | 6  | 0 | 4.510246  | -3.228883 | -1.029656 |
| 54 | 6  | 0 | 5.471883  | -2.582208 | -0.257824 |
| 55 | 6  | 0 | 5.106268  | -1.971707 | 0.937381  |
| 56 | 6  | 0 | 3.780171  | -1.989352 | 1.390785  |
| 57 | 6  | 0 | 2.156292  | -4.067357 | -1.450145 |
| 58 | 6  | 0 | 2.308369  | -5.579368 | -1.181227 |

|    |   |   |           |           |           |
|----|---|---|-----------|-----------|-----------|
| 59 | 6 | 0 | 2.226477  | -3.769087 | -2.957509 |
| 60 | 6 | 0 | 3.437798  | -1.374628 | 2.746390  |
| 61 | 6 | 0 | 3.901013  | -2.287932 | 3.901778  |
| 62 | 6 | 0 | 4.018877  | 0.037412  | 2.923564  |
| 63 | 1 | 0 | 1.156552  | 3.774464  | 1.114233  |
| 64 | 1 | 0 | 1.438027  | 4.323249  | 3.482638  |
| 65 | 1 | 0 | 2.076054  | 2.703138  | 3.150032  |
| 66 | 1 | 0 | 3.183554  | 4.074772  | 3.395104  |
| 67 | 1 | 0 | 1.555694  | 6.148016  | 1.742692  |
| 68 | 1 | 0 | 2.182569  | 5.815470  | 0.117747  |
| 69 | 1 | 0 | 3.298034  | 5.936050  | 1.486740  |
| 70 | 1 | 0 | 2.350595  | 1.273465  | -2.804655 |
| 71 | 1 | 0 | 3.663794  | -0.465675 | -3.867587 |
| 72 | 1 | 0 | 3.704274  | -0.699001 | -2.113371 |
| 73 | 1 | 0 | 5.115036  | -0.031184 | -2.957261 |
| 74 | 1 | 0 | 3.626087  | 1.848754  | -4.868048 |
| 75 | 1 | 0 | 3.452289  | 3.286068  | -3.847677 |
| 76 | 1 | 0 | 4.990801  | 2.415643  | -3.888525 |
| 77 | 1 | 0 | -1.156970 | 3.774686  | 1.113977  |
| 78 | 1 | 0 | -3.298935 | 5.935815  | 1.486414  |
| 79 | 1 | 0 | -1.556619 | 6.148224  | 1.742221  |
| 80 | 1 | 0 | -2.183540 | 5.815366  | 0.117356  |
| 81 | 1 | 0 | -2.076082 | 2.703390  | 3.150000  |
| 82 | 1 | 0 | -3.183842 | 4.074846  | 3.394986  |
| 83 | 1 | 0 | -1.438333 | 4.323628  | 3.482358  |
| 84 | 1 | 0 | -2.350824 | 1.272914  | -2.804506 |
| 85 | 1 | 0 | -3.626251 | 1.848122  | -4.867950 |
| 86 | 1 | 0 | -4.990959 | 2.415100  | -3.888471 |
| 87 | 1 | 0 | -3.452406 | 3.285482  | -3.847636 |
| 88 | 1 | 0 | -3.663980 | -0.466332 | -3.867320 |

|     |   |   |           |           |           |
|-----|---|---|-----------|-----------|-----------|
| 89  | 1 | 0 | -5.115350 | -0.031586 | -2.957297 |
| 90  | 1 | 0 | -3.704831 | -0.699477 | -2.113079 |
| 91  | 1 | 0 | -1.156918 | -3.774905 | -1.114068 |
| 92  | 1 | 0 | -3.183749 | -4.074421 | -3.395188 |
| 93  | 1 | 0 | -1.438226 | -4.323014 | -3.482552 |
| 94  | 1 | 0 | -2.076174 | -2.702911 | -3.149731 |
| 95  | 1 | 0 | -3.298958 | -5.935805 | -1.487167 |
| 96  | 1 | 0 | -1.556646 | -6.148187 | -1.743000 |
| 97  | 1 | 0 | -2.183590 | -5.815844 | -0.118036 |
| 98  | 1 | 0 | -2.350372 | -1.273021 | 2.804456  |
| 99  | 1 | 0 | -3.704751 | 0.699038  | 2.113499  |
| 100 | 1 | 0 | -5.115140 | 0.030924  | 2.957786  |
| 101 | 1 | 0 | -3.663787 | 0.465837  | 3.867719  |
| 102 | 1 | 0 | -4.989992 | -2.415956 | 3.888944  |
| 103 | 1 | 0 | -3.625280 | -1.848598 | 4.868190  |
| 104 | 1 | 0 | -3.451223 | -3.285914 | 3.847861  |
| 105 | 1 | 0 | 1.157343  | -3.774677 | -1.114237 |
| 106 | 1 | 0 | 1.557404  | -6.147930 | -1.743305 |
| 107 | 1 | 0 | 2.184131  | -5.815567 | -0.118269 |
| 108 | 1 | 0 | 3.299659  | -5.935355 | -1.487268 |
| 109 | 1 | 0 | 1.438918  | -4.322784 | -3.482773 |
| 110 | 1 | 0 | 2.076424  | -2.702551 | -3.149829 |
| 111 | 1 | 0 | 3.184381  | -4.073764 | -3.395223 |
| 112 | 1 | 0 | 2.350496  | -1.273119 | 2.804639  |
| 113 | 1 | 0 | 4.990473  | -2.415497 | 3.888839  |
| 114 | 1 | 0 | 3.451949  | -3.285923 | 3.847501  |
| 115 | 1 | 0 | 3.625544  | -1.848753 | 4.868144  |
| 116 | 1 | 0 | 3.704816  | 0.699393  | 2.113861  |
| 117 | 1 | 0 | 3.663507  | 0.465800  | 3.868034  |
| 118 | 1 | 0 | 5.115078  | 0.031174  | 2.958295  |

|     |   |   |           |           |           |
|-----|---|---|-----------|-----------|-----------|
| 119 | 1 | 0 | -2.113218 | 4.296648  | -2.251155 |
| 120 | 1 | 0 | -0.000315 | 4.977054  | -3.145132 |
| 121 | 1 | 0 | 2.112649  | 4.296830  | -2.251202 |
| 122 | 1 | 0 | -2.112722 | -4.297108 | 2.250796  |
| 123 | 1 | 0 | 0.000270  | -4.977803 | 3.144308  |
| 124 | 1 | 0 | 2.113157  | -4.297181 | 2.250519  |
| 125 | 1 | 0 | -5.864666 | -1.479108 | 1.537691  |
| 126 | 1 | 0 | -6.507743 | -2.561323 | -0.585708 |
| 127 | 1 | 0 | -4.806117 | -3.714374 | -1.955069 |
| 128 | 1 | 0 | -4.805986 | 3.714048  | 1.955453  |
| 129 | 1 | 0 | -6.507784 | 2.560808  | 0.586410  |
| 130 | 1 | 0 | 4.805643  | 3.714334  | 1.955502  |
| 131 | 1 | 0 | 6.507479  | 2.561323  | 0.586367  |
| 132 | 1 | 0 | 5.864715  | 1.479204  | -1.537185 |
| 133 | 1 | 0 | 5.864752  | -1.478155 | 1.537517  |
| 134 | 1 | 0 | 6.507980  | -2.560175 | -0.585957 |
| 135 | 1 | 0 | 4.806500  | -3.713597 | -1.955258 |
| 136 | 1 | 0 | -5.864965 | 1.478598  | -1.537091 |

---

--



## References

- S1. Yao, S.; Xiong, Y.; Szilvási, T.; Grützmacher, H.; Driess, M. *Angew. Chem. Int. Ed.* **2016**, *55*, 4781-4785; *Angew. Chem.* **2016**, *128*, 4859-4863.
- S2. Hinz, A.; Goicoechea, J. M. *Angew. Chem. Int. Ed.* **2016**, *55*, 8536-8541; *Angew. Chem.* **2016**, *128*, 8678-8683.
- S3. Krossing, I. *Chem. - Eur. J.* **2001**, *7*, 490.
- S4. Morton, J. R.; Preston, K. F. *J. Magn. Reson.* **1978**, *30*, 577-582.
- S5. Gaussian 09, Revision B.01, Frisch, M. J.; Trucks, G. W.; Schlegel, H. B.; Scuseria, G. E.; Robb, M. A.; Cheeseman, J. R.; Scalmani, G.; Barone, V.; Mennucci, B.; Petersson, G. A.; Nakatsuji, H.; Caricato, M.; Li, X.; Hratchian, H. P.; Izmaylov, A. F.; Bloino, J.; Zheng, G.; Sonnenberg, J. L.; Hada, M.; Ehara, M.; Toyota, K.; Fukuda, R.; Hasegawa, J.; Ishida, M.; Nakajima, T.; Honda, Y.; Kitao, O.; Nakai, H.; Vreven, T.; Montgomery, Jr., J. A.; Peralta, J. E.; Ogliaro, F.; Bearpark, M.; Heyd, J. J.; Brothers, E.; Kudin, K. N.; Staroverov, V. N.; Kieth, T.; Kobayashi, R.; Normand, J.; Raghavachari, K.; Rendell, A.; Burant, J. C.; Iyengar, S. S.; Tomasi, J.; Cossi, M.; Rega, N.; Millam, N. J.; Klene, M.; Knox, J. E.; Cross, J. B.; Bakken, V.; Adamo, C.; Jaramillo, J.; Gomperts, R.; Stratmann, R. E.; Yazyev, O.; Austin, A. J.; Cammi, R.; Pomelli, C.; Ochterski, J. W.; Martin, R. L.; Morokuma, K.; Zakrzewski, V. G.; Voth, G. A.; Salvador, P.; Dannenberg, J. J.; Dapprich, S.; Daniels, A. D.; Farkas, Ö.; Foresman, J. B.; Ortiz, J. V.; Cioslowski, J.; and Fox, D. J., *Gaussian 09, Revision B.01*, Gaussian, Inc., Wallingford CT, **2010**.
- S6. (a) Becke, A. D. *Phys. Rev. A* **1988**, *38*, 3098. (b) Lee, C.; Yang, W.; Parr, R. G. *Phys. Rev. B* **1988**, *37*, 785.
- S7. Dolg, M.; Wedig, U.; Stoll, H.; Preuss, H. *J. Chem. Phys.* **1987**, *86*, 866.
- S8. Stratmann, R. E.; Scuseria, G. E.; Frisch, M. J. *J. Chem. Phys.* **1998**, *109*, 8218.
- S9. (a) Frediani, L.; Rinkevicius, Z.; Ågren, H. *J. Chem. Phys.* **2005**, *122*, 244104; (b) Tomasi, J.; Mennucci, B.; Cammi, R. *Chem. Rev.* **2005**, *105*, 2999-3093.
